# Supplementary material for: Valeurs en s=1 de fonctions L de Dirichlet
Source: MDPI journal article supplement (doi:10.3390/nu15204444), 1996-01-01
Supplement: s1 [file s1]

**Table S1.** Approved vegetables (raw or steamed or boiled, baked or grilled).

| Unlimited vegetables      | Limited vegetables |
|---------------------------|--------------------|
| - Swiss chard             | asparagus          |
| - cauliflower             | - broccoli         |
| - Chinese cabbage         | - Roman broccoli   |
| - green cabbage           | - fried artichokes |
| - red and green radicchio | - cardoons         |
| - fennel                  | - Brussels sprout  |
| - mushrooms               | - green beans      |
| - Belgian lettuce         | - eggplant         |
| - lettuce                 | - yellow peppers   |
| - radish                  | - red peppers      |
| - escarole                | - green peppers    |
| - spinach                 | - tomatoes         |
| - celery                  | - turnips          |
| - raw artichokes          | - dandelion greens |
| - soybean sprouts         | - yellow squash    |
| - coppery                 |                    |
| - cucumber                |                    |
| - squash blossoms         |                    |
| - cabbage                 |                    |
| - endive                  |                    |
| - turnip greens           |                    |
| - chicory                 |                    |
| - valerian                |                    |
| - zucchini                |                    |
| - arugul                  |                    |

**Table S2.** Contents of supplements.

| Contents of supplements | Maximum dose/day |
|-------------------------|------------------|
| Potassium               | 2000 mg          |
| Calcium                 | 800 mg           |
| Magnesium               | 375 mg           |
| Vitamin C               | 120 mg           |
| Zinc                    | 10 mg            |
| Vitamin E               | 12 mg            |
| Coenzyme Q10            | 20 mg            |
| Niacin                  | 16 mg            |
| Manganese               | 2 mg             |
| Selenium                | 55 µg            |
| Vitamin A               | 800 µg           |
| Pantothenic acid        | 6 mg             |
| Vitamin B6              | 4 mg             |
| Vitamin D               | 10 µg            |
| Copper                  | 1 mg             |
| Vitamin B12             | 2.5 µg           |
| Riboflavin              | 1.4 mg           |
| Thiamine                | 1.1 mg           |
| Folic acid              | 400 µg           |
| Chromium                | 40 µg            |
| Biotin                  | 50 µg            |

**Table S3.** Typical daily patterns of the VLCKD intensive phase, VLCKD transition phase and Mediterranean diet.

|                  | VLCKD intensive phase                                                                                 | VLCKD transition phase                                                    | Mediterranean diet                                                                                                                                                                 |
|------------------|-------------------------------------------------------------------------------------------------------|---------------------------------------------------------------------------|------------------------------------------------------------------------------------------------------------------------------------------------------------------------------------|
| <b>Breakfast</b> | substitute food A + coffee/tea<br>no sugar                                                            | substitute food A + coffee/tea<br>with no sugar                           | 20 g semi-skimmed cow's<br>milk + coffee/tea with no<br>sugar + 50 g whole-wheat<br>rusks/50 g whole-wheat<br>cookies                                                              |
| <b>Snack</b>     | -                                                                                                     | -                                                                         | 300 g of fresh fruit or 160 g of<br>low-fat yogurt                                                                                                                                 |
| <b>Lunch</b>     | substitute food B + 30 g of<br>accompanying food +<br>vegetables or substitute food<br>C + vegetables | substitute food B + vegetables<br>or 120 g meat/150 g fish+<br>vegetables | 60 g bread/70 g whole-wheat<br>bread/50 g brown rice/50 g<br>whole-wheat pasta + 200 g<br>fresh vegetables or 100 g<br>low-fat cheese/1 egg or 40 g<br>ham (once a week)+ 15 g EVO |
| <b>Snack</b>     | substitute food D                                                                                     | substitute food D or 30 g dried<br>fruits                                 | 300 g fresh fruit                                                                                                                                                                  |
| <b>Dinner</b>    | substitute food C + vegetables<br>or substitute food B + 30 g<br>accompanying food +<br>vegetables    | 120 g meat/150 g fish+<br>vegetables or substitute food<br>B + vegetables | 300 g potatoes/80 g<br>bread/100 g whole grain + 50<br>g lean meat/60 g fish + 200 g<br>fresh vegetables + 15 g EVO                                                                |

**Table S4.** Nutritional information panel of substitute food A.

| Nutritional values per serving (40 g) | Substitute food A |
|---------------------------------------|-------------------|
| Energy                                | 671 kJ/ 167 kcal  |
| Fats                                  | 9.1 g             |
| of which saturated fatty acids        | 1.7 g             |
| Carbohydrates                         | 7.1 g             |
| of which sugars                       | 0.1 g             |
| of which polyols                      | 5.8 g             |
| Fibers                                | 4.0 g             |
| Proteins                              | 14 g              |
| Salt                                  | 0.04 g            |

**Table S5.** Nutritional information panel of substitute food B.

| Nutritional values per serving (50 g) | Substitute food B |
|---------------------------------------|-------------------|
| Energy                                | 622 kJ/ 149 kcal  |
| Fats                                  | 1.5 g             |
| of which saturated fatty acids        | 0.5 g             |
| Carbohydrates                         | 4.9 g             |
| of which sugars                       | 0 g               |
| Fibers                                | 17 g              |
| Proteins                              | 20 g              |
| Salt                                  | 0.01 g            |

**Table S6.** Nutritional information panel of substitute food C.

| Nutritional values per serving (30.5 g) | Substitute food C |
|-----------------------------------------|-------------------|
| Energy                                  | 464 kJ/ 110 kcal  |
| Fats                                    | 1.7 g             |
| of which saturated fatty acids          | 0.8 g             |
| Carbohydrates                           | 5.2 g             |
| of which sugars                         | 0.5 g             |
| of which starches                       | 4.7 g             |
| Fibers                                  | 0.8 g             |
| Proteins                                | 18 g              |
| Salt                                    | 2.2 g             |

**Table S7.** Nutritional information panel of substitute food D.

| Nutritional values per serving (30 g) | Substitute food D |
|---------------------------------------|-------------------|
| Energy                                | 490 kJ/ 117 kcal  |
| Fats                                  | 3.7 g             |
| of which saturated fatty acids        | 0.4 g             |
| Carbohydrates                         | 5.0 g             |
| of which sugars                       | 0.7 g             |
| Fibers                                | 4.9 g             |
| Proteins                              | 14 g              |
| Salt                                  | 0.87 g            |
